# Supplementary material for: Search for corannulene (C20H10) in the Red Rectangle
Source: Oxford University Press journal article supplement (doi:10.1111/j.1365-2966.2009.15067.x), 2009-07-02
Supplement: mnras0397-1053_Supplementary_Data.zip [file mnras0397-1053_Supplementary_Data.zip]

## A Online material

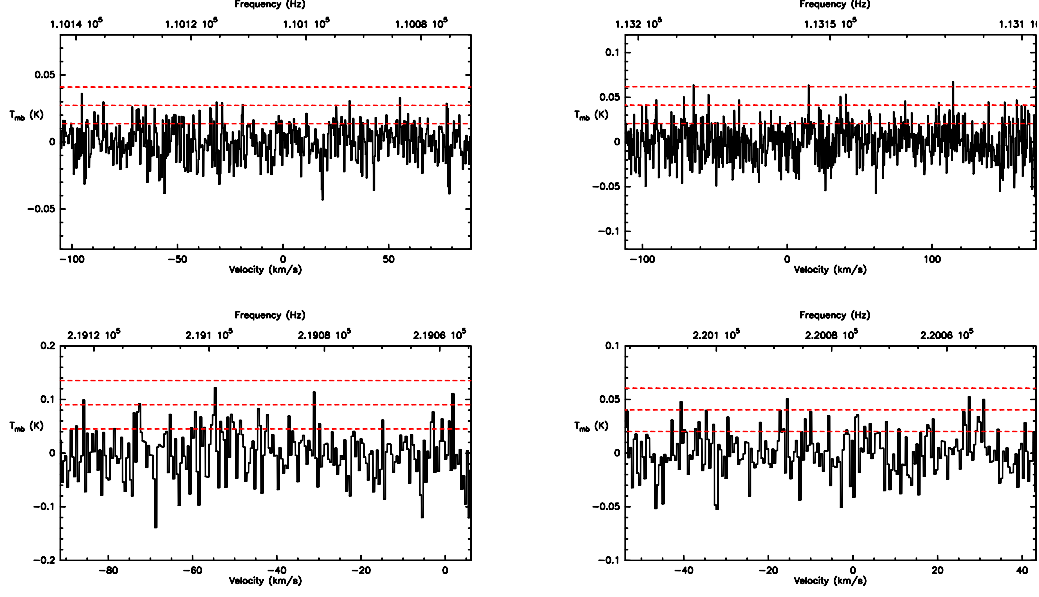

Figure A1: Observations of the expected frequency range for the pure rotational transitions of corannulene  $J + 1 \rightarrow J$ :  $108 \rightarrow 107$ ,  $111 \rightarrow 110$  and  $215 \rightarrow 214$  and  $216 \rightarrow 215$ .

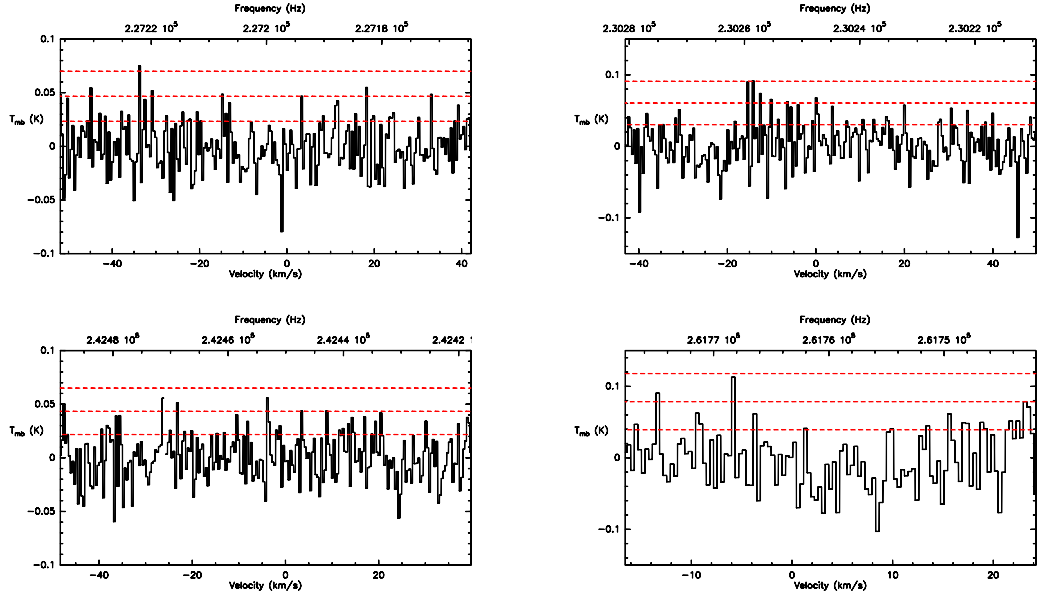

Figure A2: Observations of the expected frequency range for the pure rotational transitions of corannulene  $J + 1 \rightarrow J$ :  $223 \rightarrow 222$ ,  $226 \rightarrow 225$ ,  $238 \rightarrow 237$  and  $257 \rightarrow 256$ .
