# Supplementary material for: Search for corannulene (C20H10) in the Red Rectangle
Source: Oxford University Press journal article supplement (doi:10.1111/j.1365-2966.2009.15067.x), 2009-07-02
Supplement: mnras0397-1053_Supplementary_Data.zip [file mnras0397-1053_Supplementary_Data.zip]

Archive with 1 entries (1 files):
- mnras0397-1053-SD1.pdf
